# Supplementary material for: Machine-learning based lipid mediator serum concentration patterns allow identification of multiple sclerosis patients with high accuracy
Source: Sci Rep. 2018 Oct 5;8:14884. doi: 10.1038/s41598-018-33077-8 (PMC6173715; doi:10.1038/s41598-018-33077-8)
Supplement: Supplementary file 1 — Supplementary Dataset 1 [file 41598_2018_33077_MOESM1_ESM.xlsx]

## Sheet: PCA results
P-value
